# Supplementary material
Source: PubMed Central journal article supplement (PMC9069622)
Supplement: sj-pdf-1-jrs-10.1177_01410768221077360.pdf [file sj-pdf-1-jrs-10.1177_01410768221077360.pdf]

*Appendix A. ICD-10 codes for opioid-related hospitalisations*

**Poisoning heroin:**

T401X1A  
T401X2A  
T401X3A  
T401X4A

**Poisoning:**

F1110  
T402X1A  
T402X2A  
T402X3A  
T402X4A  
T404X1A  
T404X2A  
T404X3A  
T404X4A  
T40601A  
T40602A  
T40603A  
T40604A  
T40691A  
T40692A  
T40693A  
T40694A  
T400X1A  
T400X2A  
T400X3A  
T400X4A  
T403X1A  
T403X2A  
T403X3A  
T403X4A

**Dependence/abuse:**

F1120  
F1121  
F1920
