# Supplementary material
Source: PubMed Central journal article supplement (PMC9069622)
Supplement: sj-pdf-2-jrs-10.1177_01410768221077360.pdf [file sj-pdf-2-jrs-10.1177_01410768221077360.pdf]

*Appendix B*

**Table A1.** Regression output of the association between patient characteristics and In-hospital mortality per year

| Dep. var. In-hospital mortality<br>(logistic regression) | (1)                 | (2)                 | (3)                | (4)              | (5)                | (6)                 | (7)                | (8)                 | (9)                | (10)               | (11)             |
|----------------------------------------------------------|---------------------|---------------------|--------------------|------------------|--------------------|---------------------|--------------------|---------------------|--------------------|--------------------|------------------|
|                                                          | 2008                | 2009                | 2010               | 2011             | 2012               | 2013                | 2014               | 2015                | 2016               | 2017               | 2018             |
| <b>Female</b>                                            | Reference           | Reference           | Reference          | Reference        | Reference          | Reference           | Reference          | Reference           | Reference          | Reference          | Reference        |
| <b>Male</b>                                              | 1.503<br>(0.480)    | 1.047<br>(0.309)    | 1.153<br>(0.427)   | 1.509<br>(0.484) | 2.816**<br>(1.147) | 3.057***<br>(0.964) | 2.054**<br>(0.611) | 2.284***<br>(0.555) | 1.667*<br>(0.449)  | 1.804**<br>(0.500) | 1.451<br>(0.376) |
| <b>Age 0-14</b>                                          | Reference           | Reference           | Reference          | Reference        | Reference          | Reference           | Reference          | Reference           | Reference          | Reference          | Reference        |
| <b>Age 15-24</b>                                         | 0.062***<br>(0.052) |                     | 0.136**<br>(0.121) | 1.371<br>(1.717) |                    |                     | 0.078**<br>(0.088) | 0.034***<br>(0.038) | 0.052**<br>(0.060) | 0.222*<br>(0.203)  | 0.161<br>(0.228) |
| <b>Age 25-34</b>                                         | 0.078***<br>(0.061) | 0.092***<br>(0.069) | 0.107**<br>(0.096) | 1.433<br>(1.719) | 0.598<br>(0.575)   | 0.151***<br>(0.107) | 0.460<br>(0.295)   | 0.138***<br>(0.088) | 0.278*<br>(0.184)  | 0.886<br>(0.560)   | 0.514<br>(0.576) |
| <b>Age 35-44</b>                                         | 0.064***<br>(0.050) | 0.086***<br>(0.062) | 0.165**<br>(0.133) | 1.875<br>(2.120) | 0.324<br>(0.312)   | 0.083***<br>(0.062) | 0.413<br>(0.268)   | 0.447*<br>(0.219)   | 0.468<br>(0.270)   | 0.539<br>(0.348)   | 1.297<br>(1.368) |
| <b>Age 45-54</b>                                         | 0.096***<br>(0.075) | 0.182**<br>(0.124)  | 0.107**<br>(0.099) | 1.331<br>(1.532) | 0.299<br>(0.291)   | 0.166***<br>(0.103) | 0.507<br>(0.311)   | 0.183***<br>(0.098) | 0.245**<br>(0.143) | 0.527<br>(0.319)   | 1.433<br>(1.544) |
| <b>Age 55-64</b>                                         | 0.302<br>(0.223)    | 0.377<br>(0.240)    | 0.480<br>(0.406)   | 4.070<br>(4.523) | 0.568<br>(0.519)   | 0.224**<br>(0.151)  | 0.474<br>(0.311)   | 0.291**<br>(0.155)  | 0.277**<br>(0.158) | 0.630<br>(0.359)   | 1.306<br>(1.469) |
| <b>Age 65-74</b>                                         | 0.504<br>(0.346)    | 0.713<br>(0.432)    | 1.156<br>(0.944)   | 3.113<br>(3.528) | 0.499<br>(0.476)   | 0.266**<br>(0.169)  | 0.520<br>(0.347)   | 0.746<br>(0.337)    | 0.180**<br>(0.121) | 0.153**<br>(0.127) | 1.592<br>(1.809) |
| <b>Age 75-84</b>                                         | 0.692<br>(0.465)    | 1.663<br>(0.888)    | 2.179<br>(1.708)   | 1.633<br>(1.920) | 1.829<br>(1.500)   | 0.800<br>(0.418)    | 1.203<br>(0.733)   | 0.506<br>(0.274)    | 0.322*<br>(0.189)  | 1.213<br>(0.633)   | 3.656<br>(4.065) |

|                                       |                     |                     |                     |                     |                     |                    |                     |                     |                     |                     |                     |
|---------------------------------------|---------------------|---------------------|---------------------|---------------------|---------------------|--------------------|---------------------|---------------------|---------------------|---------------------|---------------------|
| <b>Age 85+</b>                        |                     |                     |                     |                     |                     |                    |                     |                     |                     |                     | 3.288<br>(3.737)    |
| <b>Charlson Comorbidity Index =0</b>  | Reference           | Reference           | Reference           | Reference           | Reference           | Reference          | Reference           | Reference           | Reference           | Reference           | Reference           |
| <b>Charlson Comorbidity Index =1</b>  | 2.036<br>(0.968)    | 1.497<br>(0.712)    | 1.422<br>(0.709)    | 1.753<br>(0.891)    | 2.607**<br>(1.233)  | 1.151<br>(0.565)   | 2.716***<br>(0.974) | 2.498***<br>(0.746) | 3.276***<br>(1.143) | 3.040***<br>(1.143) | 2.531***<br>(0.906) |
| <b>Charlson Comorbidity Index =2</b>  | 2.534<br>(1.587)    | 2.591*<br>(1.376)   | 1.664<br>(1.105)    | 10.51***<br>(5.081) | 1.608<br>(1.389)    | 2.950**<br>(1.437) | 3.241**<br>(1.679)  | 2.400*<br>(1.078)   | 5.032***<br>(2.278) | 6.524***<br>(3.073) | 2.597**<br>(1.242)  |
| <b>Charlson Comorbidity Index =3</b>  | 3.538<br>(2.750)    | 6.734***<br>(3.864) | 2.126<br>(1.691)    | 20.56***<br>(13.29) |                     | 4.261**<br>(2.710) | 7.221***<br>(3.980) | 2.920*<br>(1.696)   | 5.085**<br>(3.271)  | 13.64***<br>(6.937) | 5.439***<br>(2.872) |
| <b>Charlson Comorbidity Index =4</b>  |                     | 4.152*<br>(3.245)   |                     | 6.496*<br>(6.826)   | 12.43***<br>(10.54) | 3.495<br>(3.104)   | 7.532***<br>(5.352) | 7.298***<br>(4.017) | 7.825***<br>(5.887) | 8.255***<br>(5.844) | 4.142**<br>(2.696)  |
| <b>Charlson Comorbidity Index =5</b>  | 35.79***<br>(29.72) | 5.500<br>(6.431)    | 9.950***<br>(8.158) | 25.25***<br>(28.63) | 12.83**<br>(16.25)  | 4.174<br>(5.004)   |                     | 9.463***<br>(7.186) |                     |                     | 4.656*<br>(3.731)   |
| <b>Charlson Comorbidity Index =6+</b> | 1.571<br>(1.683)    | 7.375***<br>(3.526) | 2.061<br>(1.762)    | 24.68***<br>(15.80) | 7.583**<br>(6.431)  | 4.760**<br>(3.112) | 9.093***<br>(5.611) | 9.644***<br>(4.643) | 28.58***<br>(14.73) | 17.15***<br>(10.18) | 5.349***<br>(3.180) |
| <b>IMD quintile 5 - Most deprived</b> | 1.261<br>(0.858)    | 0.787<br>(0.604)    | 0.642<br>(0.330)    | 0.386**<br>(0.175)  | 1.091<br>(0.801)    | 0.609<br>(0.286)   | 0.935<br>(0.458)    | 0.782<br>(0.343)    | 1.516<br>(0.870)    | 0.958<br>(0.509)    | 1.203<br>(0.577)    |
| <b>IMD quintile 4</b>                 | 1.454<br>(1.018)    | 2.882<br>(1.871)    | 0.447<br>(0.263)    | 0.319**<br>(0.161)  | 1.035<br>(0.781)    | 0.410*<br>(0.213)  | 0.648<br>(0.357)    | 0.982<br>(0.417)    | 2.345<br>(1.334)    | 0.970<br>(0.550)    | 1.310<br>(0.630)    |
| <b>IMD quintile 3</b>                 | 0.689<br>(0.512)    | 2.208<br>(1.484)    | 0.669<br>(0.362)    | 0.414*<br>(0.199)   | 1.070<br>(0.812)    | 0.727<br>(0.344)   | 0.777<br>(0.418)    | 0.744<br>(0.338)    | 2.351<br>(1.336)    | 1.428<br>(0.766)    | 0.993<br>(0.501)    |
| <b>IMD quintile 2</b>                 | 1.853<br>(1.293)    | 1.978<br>(1.371)    | 0.389<br>(0.281)    | 0.582<br>(0.299)    | 0.982<br>(0.780)    | 0.522<br>(0.304)   | 1.816<br>(0.926)    | 1.290<br>(0.587)    | 1.102<br>(0.730)    | 2.213<br>(1.170)    | 1.319<br>(0.674)    |
| <b>IMD quintile 1 - Less deprived</b> | Reference           | Reference           | Reference           | Reference           | Reference           | Reference          | Reference           | Reference           | Reference           | Reference           | Reference           |
| <b>Number previous admissions</b>     | 0.398<br>(0.348)    | 0.530<br>(0.281)    | 0.524<br>(0.289)    | 1.032<br>(0.0541)   | 0.694<br>(0.167)    | 0.775<br>(0.137)   | 0.817<br>(0.130)    | 0.770*<br>(0.113)   | 0.558**<br>(0.135)  | 0.720*<br>(0.128)   | 0.606**<br>(0.119)  |

|                         |       |       |        |        |        |        |        |        |        |        |        |
|-------------------------|-------|-------|--------|--------|--------|--------|--------|--------|--------|--------|--------|
| <b>N</b>                | 9,888 | 8,623 | 11,140 | 10,879 | 10,955 | 12,646 | 14,961 | 14,921 | 13,750 | 13,809 | 14,966 |
| <b>Pseudo R-squared</b> | 0.162 | 0.230 | 0.141  | 0.171  | 0.098  | 0.133  | 0.108  | 0.130  | 0.132  | 0.130  | 0.107  |
| <b>Hospital FE</b>      | No    | No    | No     | No     | No     | No     | No     | No     | No     | No     | No     |

Note: Significance levels: \*\*\* p<0.01, \*\* p<0.05, \* p<0.1; Odds ratios reported and standard errors reported in parenthesis.

**Table A2.** Regression output of the association between patient characteristics and LoS per year

| Dep. var.: LoS (OLS) | (1)                  | (2)                  | (3)                  | (4)                  | (5)                 | (6)                  | (7)                 | (8)                  | (9)                | (10)               | (11)                |
|----------------------|----------------------|----------------------|----------------------|----------------------|---------------------|----------------------|---------------------|----------------------|--------------------|--------------------|---------------------|
|                      | 2008                 | 2009                 | 2010                 | 2011                 | 2012                | 2013                 | 2014                | 2015                 | 2016               | 2017               | 2018                |
| <b>Female</b>        | Reference            | Reference            | Reference            | Reference            | Reference           | Reference            | Reference           | Reference            | Reference          | Reference          | Reference           |
| <b>Male</b>          | 0.020<br>(0.071)     | -0.031<br>(0.067)    | -0.003<br>(0.0663)   | -0.065<br>(0.063)    | -0.072<br>(0.050)   | -0.133***<br>(0.045) | -0.067<br>(0.043)   | -0.012<br>(0.042)    | -0.033<br>(0.041)  | 0.004<br>(0.039)   | -0.067**<br>(0.034) |
| <b>Age 0-14</b>      | Reference            | Reference            | Reference            | Reference            | Reference           | Reference            | Reference           | Reference            | Reference          | Reference          | Reference           |
| <b>Age 15-24</b>     | -0.396***<br>(0.092) | -0.554***<br>(0.107) | -0.331***<br>(0.103) | -0.372***<br>(0.114) | -0.173*<br>(0.103)  | -0.113<br>(0.072)    | -0.106*<br>(0.060)  | -0.114<br>(0.081)    | -0.161*<br>(0.084) | -0.0854<br>(0.073) | -0.211**<br>(0.102) |
| <b>Age 25-34</b>     | -0.372***<br>(0.101) | -0.327***<br>(0.115) | -0.199*<br>(0.119)   | -0.318**<br>(0.124)  | -0.178<br>(0.109)   | -0.0641<br>(0.077)   | -0.0969<br>(0.066)  | -0.222***<br>(0.084) | -0.143<br>(0.088)  | -0.0673<br>(0.074) | -0.174*<br>(0.105)  |
| <b>Age 35-44</b>     | -0.183*<br>(0.102)   | -0.212*<br>(0.116)   | -0.0867<br>(0.116)   | -0.219*<br>(0.126)   | -0.00694<br>(0.111) | 0.00647<br>(0.080)   | -0.00671<br>(0.070) | -0.0232<br>(0.088)   | -0.096<br>(0.088)  | -0.028<br>(0.077)  | -0.039<br>(0.107)   |
| <b>Age 45-54</b>     | 0.0108<br>(0.127)    | -0.116<br>(0.126)    | -0.097<br>(0.121)    | -0.076<br>(0.135)    | 0.0533<br>(0.114)   | 0.139*<br>(0.082)    | 0.0774<br>(0.073)   | 0.0263<br>(0.091)    | -0.0131<br>(0.090) | 0.115<br>(0.081)   | -0.0967<br>(0.107)  |
| <b>Age 55-64</b>     | 0.221<br>(0.173)     | 0.331*<br>(0.170)    | 0.419***<br>(0.157)  | 0.158<br>(0.159)     | 0.376***<br>(0.136) | 0.281***<br>(0.108)  | 0.208**<br>(0.094)  | 0.393***<br>(0.117)  | 0.234**<br>(0.109) | 0.172*<br>(0.093)  | 0.0529<br>(0.116)   |

|                                       |                     |                     |                     |                     |                     |                     |                     |                     |                     |                     |                     |
|---------------------------------------|---------------------|---------------------|---------------------|---------------------|---------------------|---------------------|---------------------|---------------------|---------------------|---------------------|---------------------|
| <b>Age 65-74</b>                      | 1.618***<br>(0.333) | 0.861***<br>(0.280) | 0.389**<br>(0.189)  | 0.645***<br>(0.239) | 0.788***<br>(0.208) | 0.667***<br>(0.184) | 0.602***<br>(0.169) | 0.455***<br>(0.158) | 0.349**<br>(0.146)  | 0.518***<br>(0.138) | 0.317**<br>(0.149)  |
| <b>Age 75-84</b>                      | 1.754***<br>(0.416) | 1.897***<br>(0.423) | 2.104***<br>(0.407) | 0.937***<br>(0.308) | 1.370***<br>(0.298) | 1.242***<br>(0.270) | 0.770***<br>(0.218) | 1.108***<br>(0.255) | 1.059***<br>(0.243) | 0.769***<br>(0.196) | 0.466**<br>(0.187)  |
| <b>Age 85+</b>                        | 3.439***<br>(0.779) | 1.643***<br>(0.540) | 1.239**<br>(0.497)  | 1.943***<br>(0.523) | 1.148***<br>(0.326) | 1.889***<br>(0.434) | 1.100***<br>(0.312) | 1.421***<br>(0.367) | 1.264***<br>(0.338) | 1.000***<br>(0.313) | 0.372<br>(0.236)    |
| <b>Charlson Comorbidity Index =0</b>  | Reference           | Reference           | Reference           | Reference           | Reference           | Reference           | Reference           | Reference           | Reference           | Reference           | Reference           |
| <b>Charlson Comorbidity Index =1</b>  | 0.422***<br>(0.118) | 0.233***<br>(0.089) | 0.253***<br>(0.091) | 0.271***<br>(0.077) | 0.157**<br>(0.065)  | 0.255***<br>(0.064) | 0.133**<br>(0.055)  | 0.178***<br>(0.058) | 0.125**<br>(0.056)  | 0.182***<br>(0.051) | 0.148***<br>(0.045) |
| <b>Charlson Comorbidity Index =2</b>  | 0.584**<br>(0.285)  | 0.543*<br>(0.301)   | 0.243<br>(0.216)    | 0.975***<br>(0.238) | 0.577***<br>(0.206) | 0.320**<br>(0.139)  | 0.658***<br>(0.153) | 0.373***<br>(0.137) | 0.136<br>(0.116)    | 0.282**<br>(0.117)  | 0.258***<br>(0.098) |
| <b>Charlson Comorbidity Index =3</b>  | 2.157***<br>(0.727) | 1.086**<br>(0.531)  | 0.542<br>(0.424)    | 1.106**<br>(0.487)  | 1.234***<br>(0.413) | 0.926***<br>(0.290) | 0.532**<br>(0.231)  | 0.321<br>(0.227)    | 0.751***<br>(0.248) | 0.549***<br>(0.209) | 0.348*<br>(0.191)   |
| <b>Charlson Comorbidity Index =4</b>  | 2.901**<br>(1.287)  | 1.047<br>(1.061)    | 2.009**<br>(0.878)  | 2.363***<br>(0.766) | 0.899<br>(0.570)    | 2.069***<br>(0.654) | 1.262***<br>(0.468) | 1.013**<br>(0.466)  | 0.599<br>(0.379)    | 0.802**<br>(0.354)  | 0.427*<br>(0.233)   |
| <b>Charlson Comorbidity Index =5</b>  | 7.592***<br>(2.626) | -0.0809<br>(1.407)  | 3.950**<br>(1.649)  | 2.812<br>(1.836)    | 1.167<br>(0.992)    | 2.031*<br>(1.204)   | 2.300*<br>(1.176)   | 1.595**<br>(0.626)  | 0.311<br>(0.501)    | 0.368<br>(0.355)    | 0.667<br>(0.542)    |
| <b>Charlson Comorbidity Index =6+</b> | 0.777<br>(0.537)    | 1.170**<br>(0.574)  | 1.250**<br>(0.502)  | 0.802<br>(0.551)    | 0.149<br>(0.315)    | 0.653*<br>(0.341)   | 1.278***<br>(0.399) | 0.579<br>(0.371)    | 0.403<br>(0.266)    | 0.652*<br>(0.373)   | 0.241<br>(0.206)    |
| <b>IMD quintile 5 - Most deprived</b> | -0.302*<br>(0.155)  | -0.090<br>(0.140)   | 0.027<br>(0.132)    | -0.162<br>(0.130)   | 0.0217<br>(0.096)   | 0.012<br>(0.090)    | -0.113<br>(0.088)   | -0.021<br>(0.088)   | -0.112<br>(0.083)   | -0.052<br>(0.078)   | 0.003<br>(0.060)    |
| <b>IMD quintile 4</b>                 | -0.113<br>(0.157)   | -0.165<br>(0.142)   | 0.039<br>(0.134)    | -0.232*<br>(0.132)  | -0.100<br>(0.097)   | 0.0231<br>(0.093)   | -0.107<br>(0.086)   | 0.0198<br>(0.090)   | -0.067<br>(0.086)   | -0.073<br>(0.078)   | 0.034<br>(0.058)    |
| <b>IMD quintile 3</b>                 | -0.272*<br>(0.158)  | -0.019<br>(0.144)   | -0.181<br>(0.134)   | -0.170<br>(0.136)   | -0.035<br>(0.101)   | 0.037<br>(0.092)    | -0.103<br>(0.087)   | 0.019<br>(0.086)    | -0.087<br>(0.084)   | -0.025<br>(0.079)   | 0.032<br>(0.063)    |
| <b>IMD quintile 2</b>                 | -0.120<br>(0.173)   | -0.243<br>(0.151)   | 0.047<br>(0.148)    | -0.127<br>(0.153)   | 0.119<br>(0.115)    | 0.120<br>(0.105)    | -0.077<br>(0.099)   | -0.011<br>(0.095)   | 0.014<br>(0.093)    | 0.006<br>(0.086)    | 0.029<br>(0.067)    |

|                                       |                   |                   |                   |                    |                   |                   |                   |                     |                  |                  |                      |
|---------------------------------------|-------------------|-------------------|-------------------|--------------------|-------------------|-------------------|-------------------|---------------------|------------------|------------------|----------------------|
| <b>IMD quintile 1 - Less deprived</b> | Reference         | Reference         | Reference         | Reference          | Reference         | Reference         | Reference         | Reference           | Reference        | Reference        | Reference            |
| <b>Number previous admissions</b>     | -0.075<br>(0.048) | -0.039<br>(0.030) | -0.009<br>(0.027) | -0.028*<br>(0.014) | -0.021<br>(0.016) | -0.014<br>(0.015) | -0.016<br>(0.013) | -0.022**<br>(0.011) | 0.011<br>(0.009) | 0.005<br>(0.010) | -0.019***<br>(0.004) |
| <b>N</b>                              | 10,077            | 10,873            | 11,384            | 11,040             | 13,956            | 15,896            | 15,292            | 15,143              | 14,010           | 14,100           | 14,810               |
| <b>R-squared</b>                      | 0.565             | 0.610             | 0.608             | 0.611              | 0.538             | 0.550             | 0.570             | 0.439               | 0.419            | 0.379            | 0.378                |
| <b>Hospital FE</b>                    | Yes               | Yes               | Yes               | Yes                | Yes               | Yes               | Yes               | Yes                 | Yes              | Yes              | Yes                  |

Note: Significance levels: \*\*\* p<0.01, \*\* p<0.05, \* p<0.1; Marginal effects reported and standard errors reported in parenthesis; OLS – ordinary least squares. Patients who died are not included.

**Table A3.** Regression output of the association between patient characteristics and 30-day readmission per year

| Dep. var.: 30-day readmission<br>(logistic regression) | (1)                 | (2)                 | (3)                 | (4)                 | (5)                 | (6)                 | (7)                 | (8)                 | (9)                | (10)                | (11)               |
|--------------------------------------------------------|---------------------|---------------------|---------------------|---------------------|---------------------|---------------------|---------------------|---------------------|--------------------|---------------------|--------------------|
|                                                        | 2008                | 2009                | 2010                | 2011                | 2012                | 2013                | 2014                | 2015                | 2016               | 2017                | 2018               |
| <b>Female</b>                                          | Reference           | Reference           | Reference           | Reference           | Reference           | Reference           | Reference           | Reference           | Reference          | Reference           | Reference          |
| <b>Male</b>                                            | 0.984<br>(0.060)    | 0.987<br>(0.057)    | 1.075<br>(0.061)    | 1.153***<br>(0.063) | 1.074<br>(0.051)    | 1.089*<br>(0.049)   | 1.061<br>(0.048)    | 0.978<br>(0.045)    | 1.036<br>(0.048)   | 1.158***<br>(0.055) | 1.030<br>(0.047)   |
| <b>Age 0-14</b>                                        | Reference           | Reference           | Reference           | Reference           | Reference           | Reference           | Reference           | Reference           | Reference          | Reference           | Reference          |
| <b>Age 15-24</b>                                       | 1.760**<br>(0.473)  | 1.829**<br>(0.508)  | 1.833**<br>(0.448)  | 2.364***<br>(0.635) | 2.291***<br>(0.500) | 2.068***<br>(0.412) | 1.477**<br>(0.274)  | 2.885***<br>(0.692) | 1.505**<br>(0.275) | 1.955***<br>(0.409) | 1.395*<br>(0.253)  |
| <b>Age 25-34</b>                                       | 2.287***<br>(0.609) | 2.465***<br>(0.681) | 1.972***<br>(0.481) | 2.651***<br>(0.708) | 2.092***<br>(0.457) | 2.278***<br>(0.453) | 1.810***<br>(0.331) | 2.834***<br>(0.680) | 1.584**<br>(0.287) | 2.214***<br>(0.461) | 1.585**<br>(0.286) |
| <b>Age 35-44</b>                                       | 2.782***<br>(0.738) | 3.110***<br>(0.855) | 2.260***<br>(0.549) | 2.724***<br>(0.727) | 2.463***<br>(0.536) | 2.185***<br>(0.435) | 1.873***<br>(0.341) | 3.340***<br>(0.800) | 1.440**<br>(0.262) | 2.196***<br>(0.457) | 1.511**<br>(0.273) |

|                                       |                     |                     |                     |                     |                     |                     |                     |                     |                     |                     |                     |
|---------------------------------------|---------------------|---------------------|---------------------|---------------------|---------------------|---------------------|---------------------|---------------------|---------------------|---------------------|---------------------|
| <b>Age 45-54</b>                      | 2.575***<br>(0.701) | 3.271***<br>(0.912) | 2.370***<br>(0.582) | 2.674***<br>(0.723) | 2.350***<br>(0.516) | 2.463***<br>(0.492) | 1.908***<br>(0.350) | 3.095***<br>(0.744) | 1.517**<br>(0.277)  | 1.866***<br>(0.392) | 1.484**<br>(0.270)  |
| <b>Age 55-64</b>                      | 2.844***<br>(0.819) | 3.272***<br>(0.947) | 2.751***<br>(0.712) | 2.803***<br>(0.791) | 2.811***<br>(0.639) | 2.355***<br>(0.497) | 1.978***<br>(0.384) | 3.210***<br>(0.796) | 1.436*<br>(0.275)   | 1.975***<br>(0.428) | 1.097<br>(0.210)    |
| <b>Age 65-74</b>                      | 3.061***<br>(0.950) | 2.587***<br>(0.833) | 2.505***<br>(0.700) | 1.814*<br>(0.560)   | 2.452***<br>(0.602) | 2.269***<br>(0.523) | 2.060***<br>(0.428) | 3.506***<br>(0.904) | 1.309<br>(0.274)    | 2.458***<br>(0.559) | 1.478*<br>(0.297)   |
| <b>Age 75-84</b>                      | 3.499***<br>(1.123) | 2.633***<br>(0.850) | 2.663***<br>(0.758) | 3.312***<br>(1.012) | 2.559***<br>(0.657) | 2.117***<br>(0.516) | 1.961***<br>(0.435) | 2.919***<br>(0.794) | 2.056***<br>(0.441) | 2.507***<br>(0.602) | 1.369<br>(0.295)    |
| <b>Age 85+</b>                        | 3.001***<br>(1.116) | 2.460**<br>(0.909)  | 3.118***<br>(0.999) | 3.220***<br>(1.084) | 3.308***<br>(0.895) | 2.422***<br>(0.630) | 1.827**<br>(0.453)  | 3.295***<br>(0.930) | 2.077***<br>(0.479) | 2.657***<br>(0.677) | 1.246<br>(0.299)    |
| <b>Charlson Comorbidity Index =0</b>  | Reference           | Reference           | Reference           | Reference           | Reference           | Reference           | Reference           | Reference           | Reference           | Reference           | Reference           |
| <b>Charlson Comorbidity Index =1</b>  | 1.206**<br>(0.110)  | 1.238***<br>(0.099) | 1.395***<br>(0.105) | 1.492***<br>(0.105) | 1.352***<br>(0.084) | 1.447***<br>(0.082) | 1.368***<br>(0.078) | 1.288***<br>(0.074) | 1.311***<br>(0.077) | 1.284***<br>(0.076) | 1.581***<br>(0.088) |
| <b>Charlson Comorbidity Index =2</b>  | 1.557**<br>(0.274)  | 1.906***<br>(0.282) | 1.574***<br>(0.223) | 2.142***<br>(0.283) | 2.046***<br>(0.225) | 1.870***<br>(0.193) | 1.424***<br>(0.144) | 1.799***<br>(0.173) | 1.861***<br>(0.179) | 1.693***<br>(0.168) | 2.247***<br>(0.205) |
| <b>Charlson Comorbidity Index =3</b>  | 2.361***<br>(0.613) | 1.968***<br>(0.470) | 2.387***<br>(0.512) | 1.553*<br>(0.357)   | 2.075***<br>(0.355) | 2.341***<br>(0.377) | 1.832***<br>(0.280) | 2.061***<br>(0.286) | 2.266***<br>(0.301) | 1.981***<br>(0.283) | 2.392***<br>(0.306) |
| <b>Charlson Comorbidity Index =4</b>  | 1.392<br>(0.634)    | 2.199*<br>(0.887)   | 3.485***<br>(1.144) | 1.759*<br>(0.557)   | 1.725**<br>(0.474)  | 2.293***<br>(0.534) | 1.398<br>(0.333)    | 3.064***<br>(0.626) | 2.938***<br>(0.545) | 2.502***<br>(0.456) | 2.181***<br>(0.401) |
| <b>Charlson Comorbidity Index =5</b>  | 1.490<br>(0.967)    | 13.64***<br>(7.582) | 1.291<br>(0.749)    | 0.861<br>(0.697)    | 0.863<br>(0.559)    | 2.039*<br>(0.843)   | 3.737***<br>(1.374) | 2.340***<br>(0.667) | 3.074***<br>(0.906) | 2.220***<br>(0.640) | 2.940***<br>(0.734) |
| <b>Charlson Comorbidity Index =6+</b> | 1.671*<br>(0.519)   | 2.107***<br>(0.524) | 2.604***<br>(0.630) | 2.084***<br>(0.501) | 2.241***<br>(0.517) | 1.450*<br>(0.320)   | 1.739**<br>(0.379)  | 2.236***<br>(0.446) | 1.392<br>(0.295)    | 1.885***<br>(0.357) | 2.459***<br>(0.453) |
| <b>IMD quintile 5 - Most deprived</b> | 1.135<br>(0.154)    | 1.087<br>(0.132)    | 0.994<br>(0.117)    | 1.149<br>(0.140)    | 1.193*<br>(0.120)   | 1.130<br>(0.103)    | 1.149<br>(0.111)    | 1.131<br>(0.109)    | 1.373***<br>(0.130) | 1.107<br>(0.104)    | 1.212**<br>(0.110)  |
| <b>IMD quintile 4</b>                 | 1.173<br>(0.161)    | 1.091<br>(0.133)    | 1.014<br>(0.120)    | 1.103<br>(0.136)    | 1.253**<br>(0.128)  | 0.993<br>(0.092)    | 1.227**<br>(0.118)  | 1.146<br>(0.110)    | 1.183*<br>(0.116)   | 1.134<br>(0.107)    | 1.051<br>(0.096)    |

|                                       |                     |                     |                     |                     |                     |                     |                     |                     |                     |                     |                     |
|---------------------------------------|---------------------|---------------------|---------------------|---------------------|---------------------|---------------------|---------------------|---------------------|---------------------|---------------------|---------------------|
| <b>IMD quintile 3</b>                 | 1.060<br>(0.146)    | 1.011<br>(0.126)    | 0.878<br>(0.106)    | 1.166<br>(0.145)    | 1.221*<br>(0.125)   | 1.003<br>(0.093)    | 1.263**<br>(0.122)  | 1.207*<br>(0.116)   | 1.200*<br>(0.117)   | 1.188*<br>(0.112)   | 1.076<br>(0.099)    |
| <b>IMD quintile 2</b>                 | 1.061<br>(0.160)    | 1.094<br>(0.146)    | 0.907<br>(0.121)    | 1.023<br>(0.139)    | 0.983<br>(0.113)    | 0.844<br>(0.089)    | 1.129<br>(0.121)    | 1.056<br>(0.111)    | 1.100<br>(0.117)    | 0.988<br>(0.103)    | 1.003<br>(0.100)    |
| <b>IMD quintile 1 - Less deprived</b> | Reference           | Reference           | Reference           | Reference           | Reference           | Reference           | Reference           | Reference           | Reference           | Reference           | Reference           |
| <b>Number previous admissions</b>     | 2.405***<br>(0.197) | 1.639***<br>(0.086) | 1.694***<br>(0.077) | 1.521***<br>(0.076) | 1.467***<br>(0.052) | 1.455***<br>(0.035) | 1.355***<br>(0.028) | 1.413***<br>(0.035) | 1.283***<br>(0.026) | 1.281***<br>(0.027) | 1.256***<br>(0.035) |
| <b>N</b>                              | 9,909               | 10,784              | 11,340              | 11,033              | 14,013              | 15,976              | 15,388              | 15,207              | 14,111              | 14,218              | 14,913              |
| <b>R-squared</b>                      | 0.091               | 0.091               | 0.083               | 0.075               | 0.067               | 0.073               | 0.066               | 0.076               | 0.065               | 0.064               | 0.074               |
| <b>Hospital FE</b>                    | Yes                 | Yes                 | Yes                 | Yes                 | Yes                 | Yes                 | Yes                 | Yes                 | Yes                 | Yes                 | Yes                 |

Note: Significance levels: \*\*\* p<0.01, \*\* p<0.05, \* p<0.1; Odds ratios reported and standard errors reported in parenthesis.
